# Supplementary material
Source: publisher figshare collection journal article supplement (https://future-science-group.figshare.com/ndownloader/files/34177632)
Supplement: Supplementary file 1 [file 34177632]

| **Supplemental Table S1. The follow-up information of patients with hepatocellular carcinoma** (n=111) | | |
| --- | --- | --- |
| **Characteristic** | **No.** | **Percentage (%)** |
| **1. Physiological grade** |  |  |
| I | 23 | 20.7 |
| II | 81 | 73.0 |
| III | 7 | 6.3 |
| **2. Vascular invasion** |  |  |
| No | 89 | 80.2 |
| Yes | 22 | 19.8 |
| **3. Tumor recurrence** |  |  |
| No | 63 | 56.8 |
| Yes | 47 | 42.3 |
| **4. PD-L1 expression** |  |  |
| Low | 40 | 36.0 |
| High | 55 | 49.5 |
| **5. HIF-1α expression** |  |  |
| Low | 51 | 45.9 |
| High | 60 | 54.1 |
| **6. CD8+ T cell infiltration level** |  |  |
| Low | 54 | 48.6 |
| High | 54 | 48.6 |
| **7. CD68+ T cell infiltration level** |  |  |
| Low | 55 | 49.5 |
| High | 55 | 49.5 |
| **8. Survival time** (years after operation) |  |  |
| ≤4 | 49 | 44.1 |
| >4 | 55 | 49.5 |
